# Supplementary material
Source: HighWire-hosted journal article supplement (http://www.qdcxjkg.com/highwire/filestream/131951/field_highwire_adjunct_files/0/ERJ-00308-2016_Supplement.pdf)
Supplement: ERJ-00308-2016_Supplement.pdf [file ERJ-00308-2016_Supplement.pdf]

**Supplemental Table S1: Characteristics of the Genetic Mutations and Number of ILD Individuals Included from Each Kindred**

| Gene        | DNA Change*          | Impact on Protein* | Frequency in ExAC database† | Number of ILD patients with Blood Telomere Length data | Telomere length, In Rel(T/S) ( $\pm$ S.D.) | Age-adjusted Telomere Length ( $\pm$ S.D.) | Telomere length percentile (mean) | References (other studies) | Number of Individuals Included in this study |
|-------------|----------------------|--------------------|-----------------------------|--------------------------------------------------------|--------------------------------------------|--------------------------------------------|-----------------------------------|----------------------------|----------------------------------------------|
| <i>TERT</i> | c.97C>T              | p.Pro33Ser         | Absent                      | 1                                                      | 0.855                                      | -0.69                                      | <1                                | [1, 2]                     | 1                                            |
| <i>TERT</i> | c.293C>A             | p.Ala98Asp         | Absent                      | 1                                                      | 0.450                                      | -1.06                                      | <1                                |                            | 1                                            |
| <i>TERT</i> | c.377C>A             | p.Thr126Lys        | Absent                      | 1                                                      | 1.167                                      | -0.42                                      | 2-3                               | [3]                        | 1                                            |
| <i>TERT</i> | c.416T>G             | p.Leu139Arg        | Absent                      | 1                                                      | 0.843                                      | -0.81                                      | <1                                |                            | 1                                            |
| <i>TERT</i> | c.430G>A             | p.Val144Met        | Absent                      | 3                                                      | 0.95 $\pm$ 0.03                            | -0.61 $\pm$ 0.02                           | <1                                | [1, 2]                     | 5                                            |
| <i>TERT</i> | c.569C>T             | p.Ala190Val        | 0.00001765                  | 1                                                      | 1.235                                      | -0.47                                      | 1-2                               |                            | 1                                            |
| <i>TERT</i> | c.1002_1004delCTC    | p.Ser335del        | Absent                      | 1                                                      | 0.909                                      | -0.55                                      | <1                                | [3]                        | 1                                            |
| <i>TERT</i> | c.1397G>C            | p.Arg466Pro        | Absent                      | 1                                                      | 0.817                                      | -0.70                                      | <1                                |                            | 1                                            |
| <i>TERT</i> | c.1417G>C            | p.Val473Leu        | Absent                      | 1                                                      | 1.137                                      | -0.39                                      | 3-4                               |                            | 1                                            |
| <i>TERT</i> | c.1456C>T            | p.Arg486Cys        | Absent                      | 2                                                      | 1.03 $\pm$ 0.01                            | -0.46 $\pm$ 0.11                           | 1-2                               | [1-3]                      | 2                                            |
| <i>TERT</i> | c.1603C>T            | p.Arg535Cys        | Absent                      | 1                                                      | 0.739                                      | -0.68                                      | <1                                |                            | 1                                            |
| <i>TERT</i> | c.1710G>T            | p.Lys570Asn        | Absent                      | 1                                                      | 0.735                                      | -0.78                                      | <1                                | [3, 4]                     | 1                                            |
| <i>TERT</i> | c.1892G>A            | p.Arg631Gln        | Absent                      | 4                                                      | 0.75 $\pm$ 0.23                            | -0.75 $\pm$ 0.25                           | <1                                | [2]                        | 4                                            |
| <i>TERT</i> | c.1895C>T            | p.Pro632Leu        | Absent                      | 1                                                      | 0.231                                      | -1.37                                      | <1                                |                            | 1                                            |
| <i>TERT</i> | c.2006C>T            | p.Arg669Gln        | Absent                      | 1                                                      | 1.197                                      | -0.31                                      | 9-10                              |                            | 1                                            |
| <i>TERT</i> | c.2011C>T            | p.Arg671Trp        | Absent                      | 1                                                      | 0.813                                      | -0.60                                      | <1                                | [2]                        | 1                                            |
| <i>TERT</i> | c.2033C>A            | p.Ala678Asp        | Absent                      | 1                                                      | 0.659                                      | -0.96                                      | <1                                | [5]                        | 1                                            |
| <i>TERT</i> | c.2080G>A            | p.Val694Met        | Absent                      | 1                                                      | 1.113                                      | -0.41                                      | 2-3                               | [2, 6, 7]                  | 1                                            |
| <i>TERT</i> | c.2105C>T            | p.Pro702Leu        | Absent                      | 3                                                      | 1.03 $\pm$ 0.36                            | -0.51 $\pm$ 0.35                           | <1                                | [2, 3, 6]                  | 4                                            |
| <i>TERT</i> | c.2110C>T            | p.Pro704Ser        | Absent                      | 3                                                      | 1.12 $\pm$ 0.16                            | -0.36 $\pm$ 0.15                           | 4-5                               | [2, 6, 8, 9]               | 3                                            |
| <i>TERT</i> | c.2240delIT          | p.Val747fsX19      | Absent                      | 2                                                      | 1.04 $\pm$ 0.25                            | -0.46                                      | 1-2                               | [1, 2]                     | 4                                            |
| <i>TERT</i> | c.2266C>T            | p.Arg756Cys        | 0.000008238                 | 1                                                      | 0.832                                      | -0.79                                      | <1                                |                            | 1                                            |
| <i>TERT</i> | c.[2431C>T;2433C>T]‡ | p.Arg811Cys        | Absent                      | 2                                                      | 0.57 $\pm$ 0.40                            | -0.89 $\pm$ 0.38                           | <1                                |                            | 2                                            |
| <i>TERT</i> | c.2469-2A>T          | Splicing           | Absent                      | 2                                                      | 0.72 $\pm$ 0.22                            | -0.87 $\pm$ 0.23                           | <1                                |                            | 2                                            |
| <i>TERT</i> | c.2521C>T            | p.Leu841Phe        | Absent                      | 1                                                      | 1.090                                      | -0.42                                      | 2-3                               | [10]                       | 1                                            |
| <i>TERT</i> | c.2539G>A            | p.Gly847Ser        | Absent                      | 1                                                      | 1.247                                      | -0.35                                      | 6-7                               | [3]                        | 1                                            |

|              |                   |                  |             |   |           |            |        |          |   |
|--------------|-------------------|------------------|-------------|---|-----------|------------|--------|----------|---|
| <i>TERT</i>  | c.2572C>T         | p.Arg858Trp      | Absent      | 1 | 0.829     | -0.66      | <1     |          | 1 |
| <i>TERT</i>  | c.2593C>T         | p.Arg865Cys      | Absent      | 1 | 1.031     | -0.47      | 1-2    | [1-3]    | 1 |
| <i>TERT</i>  | c.2594G>A         | p.Arg865His      | 0.00001278  | 2 | 1.01±0.17 | -0.54±0.18 | <1     | [1-3]    | 5 |
| <i>TERT</i>  | c.2599G>A         | p.Val867Met      | Absent      | 1 | 1.148     | -0.36      | 5-6    | [2]      | 1 |
| <i>TERT</i>  | c.2621C>G         | p.Thr874Arg      | Absent      | 2 | 0.83±0.35 | -0.66±0.37 | <1     |          | 2 |
| <i>TERT</i>  | c.2647T>A         | p.Phe883Ile      | Absent      | 1 | 1.083     | -0.50      | <1     |          | 1 |
| <i>TERT</i>  | c.2775C>A         | p.His925Gln      | 0.00001674  | 1 | 1.615     | 0.06       | 50-51§ | [2]      | 2 |
| <i>TERT</i>  | c.2851C>T         | p.Arg951Trp      | 0.000008290 | 2 | 1.14±0.22 | -0.36±0.15 | 5-6    | [2]      | 4 |
| <i>TERT</i>  | c.2869A>C         | p.Ser957Arg      | Absent      | 1 | 0.580     | -0.95      | <1     | [2, 6]   | 1 |
| <i>TERT</i>  | c.2912G>A         | p.Arg971His      | Absent      | 1 | 0.925     | -0.59      | <1     |          | 1 |
| <i>TERT</i>  | c.2947C>T         | p.His983Tyr      | Absent      | 1 | 1.077     | -0.50      | <1     |          | 1 |
| <i>TERT</i>  | c.3055C>T         | p.Leu1019Phe     | Absent      | 1 | 0.926     | -0.57      | <1     | [2, 6]   | 2 |
| <i>TERT</i>  | c.3148A>G         | p.Lys1050Glu     | Absent      | 1 | 1.057     | -0.47      | 1-2    | [2, 6]   | 1 |
| <i>TERT</i>  | c.3150G>C         | p.Lys1050Asn     | 0.00008867  | 1 | 1.064     | -0.42      | 2-3    |          | 1 |
| <i>TERT</i>  | c.3187G>A         | p.Gly1063Ser     | Absent      | 2 | 1.21±0.69 | -0.33±0.67 | 6-7    | [2]      | 3 |
| <i>TERT</i>  | c.3202G>A         | p.Glu1068Lys     | Absent      | 2 | 0.83±0.21 | -0.66±0.21 | <1     | [3]      | 2 |
| <i>TERT</i>  | c.3346_3522del177 | p.Glu1116fsX11   | Absent      | 1 | 1.073     | -0.50      | <1     | [1, 2]   | 2 |
| <i>TERC</i>  | r.11g>t           |                  | Absent      | 1 | 1.236     | -0.41      | 3-4    |          | 1 |
| <i>TERC</i>  | r.37a>g           |                  | 0.00001827  | 1 | 1.047     | -0.45      | 1-2    | [1, 11]  | 1 |
| <i>TERC</i>  | r.66c>a           |                  | Absent      | 1 | 0.615     | -1.05      | <1     |          | 1 |
| <i>TERC</i>  | r.116c>t          |                  | Absent      | 1 | 0.862     | -0.67      | <1     | [12, 13] | 1 |
| <i>TERC</i>  | r.182g>c          |                  | Absent      | 2 | 0.61±0.06 | -0.89±0.03 | <1     | [3]      | 2 |
| <i>TERC</i>  | r.234c>g          |                  | Absent      | 1 | 1.058     | -0.56      | <1     |          | 1 |
| <i>RTEL1</i> | c.602delG         | p.Gly201GlufsX15 | Absent      | 1 | 1.205     | -0.27      | 15-16  | [14]     | 2 |
| <i>RTEL1</i> | c.1451C>T         | p.Pro484Leu      | Absent      | 1 | 1.008     | -0.55      | <1     | [14]     | 5 |
| <i>RTEL1</i> | c.1940C>T         | p.Pro647Leu      | Absent      | 1 | 1.118     | -0.43      | 2-3    | [14]     | 1 |
| <i>RTEL1</i> | c.2005C>T         | p.Gln669X        | Absent      | 1 | 0.871     | -0.64      | <1     | [14]     | 2 |
| <i>RTEL1</i> | c.2063C>G         | p.Ser688Cys      | 0.000008572 | 1 | 1.028     | -0.48      | 1-2    |          | 1 |
| <i>RTEL1</i> | c.2205_2207delGAC | p.Asp736del      | Absent      | 1 | 0.814     | -0.66      | <1     |          | 2 |
| <i>RTEL1</i> | c.3371A>C         | p.His1124Pro     | Absent      | 1 | 1.062     | -0.53      | <1     | [14]     | 1 |
| <i>PARN</i>  | c.246-2A>G        | Splicing         | 0.00001394  | 2 | 0.99±0.04 | -0.47±0.06 | 1-2    | [14]     | 5 |
| <i>PARN</i>  | c.529C>T          | p.Gln177X        | Absent      | 1 | 0.957     | -0.67      | <1     | [14]     | 4 |

|             |                  |                  |             |   |           |            |       |      |   |
|-------------|------------------|------------------|-------------|---|-----------|------------|-------|------|---|
| <i>PARN</i> | c.563_564insT    | p.Ile188IlefsX7  | Absent      | 1 | 1.297     | -0.22      | 24-25 | [14] | 2 |
| <i>PARN</i> | c.751delA        | p.Arg251GlufsX14 | Absent      | 1 | 1.196     | -0.29      | 12-13 | [14] | 1 |
| <i>PARN</i> | c.874delG        | p.Asp292ThrfsX16 | Absent      | 2 | 1.16±0.14 | -0.30±0.05 | 10-11 |      | 3 |
| <i>PARN</i> | c.1081+1G>A      | Splicing         | Absent      | 1 | 1.245     | -0.19      | 30-31 | [14] | 2 |
| <i>PARN</i> | c.1262A>G        | p.Lys421Arg      | 0.000008294 | 1 | 1.083     | -0.37      | 4-5   | [14] | 1 |
| <i>PARN</i> | c.1749_1750delAG | p.Glu585AspfsX4  | Absent      | 1 | 1.129     | -0.35      | 6-7   |      | 1 |

\*The positions of the DNA, RNA and protein variants are described using TERT NM\_198253.2 (isoform 1), TERC NR\_001566.1, PARN NM\_002582.3 (isoform 1) and RTEL1 NM\_001283009.1 (isoform 3).

†The frequency (if present) of the variants found in the Exome Aggregation Consortium (ExAC) database version 0.3 ([www.exac.broadinstitute.org](http://www.exac.broadinstitute.org)) are listed.

‡Both variants are found in two siblings, suggesting that they are in *cis* and in the same allele.

§This same rare variant was found by directly sequencing lung tissue from an affected sister with IPF, liver dysfunction, leukopenia, and anemia. Telomerase activity as measured by the *in vitro* telomere repeat amplification protocol (TRAP) was 40.4%[2].

**Supplemental Table S2: Selected Comorbid Conditions of ILD Subjects with Heterozygous *TERT*, *TERC*, *RTEL1* or *PARN* Mutations**

|                        | <b>Total<br/>(N=115)</b> | <b><i>TERT</i><br/>(N=75)</b> | <b><i>TERC</i><br/>(N=7)</b> | <b><i>RTEL1</i><br/>(N=14)</b> | <b><i>PARN</i><br/>(N=19)</b> | <b>P-<br/>value</b> |
|------------------------|--------------------------|-------------------------------|------------------------------|--------------------------------|-------------------------------|---------------------|
| Musculoskeletal, N (%) |                          |                               |                              |                                |                               |                     |
| Osteopenia             | 8 (7.0)                  | 6 (8.0)                       | 1 (14.3)                     | 1 (7.1)                        | 0                             | 0.45                |
| Osteoporosis           | 12 (10.4)                | 6 (8.0)                       | 1 (14.3)                     | 0                              | 5 (26.3)                      | 0.054               |
| Scoliosis              | 2 (1.7)                  | 1 (1.3)                       | 0                            | 1 (7.1)                        | 0                             | 0.36                |
| Psychiatry, N (%)      |                          |                               |                              |                                |                               |                     |
| Depression             | 15 (13)                  | 11 (14.7)                     | 0                            | 2 (14.3)                       | 2 (10.5)                      | 0.86                |
| Anxiety                | 7 (6.0)                  | 4 (4.0)                       | 2 (28.6)                     | 1 (7.1)                        | 0                             | 0.080               |
| Endocrine, N (%)       |                          |                               |                              |                                |                               |                     |
| Hypothyroidism         | 17 (14.8)                | 8 (10.7)                      | 1 (14.3)                     | 3 (21.4)                       | 5 (26.3)                      | 0.26                |
| Diabetes Mellitus      | 8 (7.0)                  | 3 (4.0)                       | 0                            | 1 (7.1)                        | 4 (21.1)                      | 0.070               |
| Cardiovascular, N (%)  |                          |                               |                              |                                |                               |                     |
| Atherosclerosis        | 11 (9.6)                 | 5 (6.7)                       | 0                            | 4 (28.6)                       | 2 (28.6)                      | 0.082               |
| CHF                    | 3 (2.6)                  | 2 (2.7)                       | 0                            | 0                              | 1 (5.3)                       | 0.73                |

The prevalence of comorbid conditions is compared using Fisher's exact test.

Abbreviations used: CHF, congestive heart disease

**Supplemental Table S3: Radiographic Characteristics of ILD Subjects with Heterozygous *TERT*, *TERC*, *RTEL1* or *PARN* Mutations**

|                                                 | <b>Total</b> | <b><i>TERT</i></b> | <b><i>TERC</i></b> | <b><i>RTEL1</i></b> | <b><i>PARN</i></b> | <b>P-value</b> |
|-------------------------------------------------|--------------|--------------------|--------------------|---------------------|--------------------|----------------|
| <b>Number Subjects, N</b>                       | 73           | 52                 | 4                  | 10                  | 7                  |                |
| <b>Overall Diagnosis</b>                        |              |                    |                    |                     |                    |                |
| Definite UIP                                    | 34 (46.6)    | 25 (48.1)          | 1 (25.0)           | 6 (60.0)            | 2 (28.6)           | 0.54           |
| Possible UIP                                    | 24 (32.9)    | 17 (32.7)          | 2 (50.0)           | 1 (10.0)            | 4 (57.1)           | 0.16           |
| Inconsistent with UIP                           | 15 (20.5)    | 10 (19.2)          | 1 (25.0)           | 3 (30.0)            | 1 (14.3)           | 0.78           |
| <b>Radiographic Feature, N</b>                  |              |                    |                    |                     |                    |                |
| Reticulation                                    | 72 (98.6)    | 52 (100)           | 4 (100)            | 9 (90.0)            | 7 (100)            | 0.29           |
| Intralobular Septal Thickening                  | 71 (97.3)    | 51 (98.1)          | 4 (100)            | 9 (90.0)            | 7 (100)            | 0.50           |
| Macrocytic Honeycombing                         | 37 (50.7)    | 26 (50)            | 2 (50.0)           | 5 (50.0)            | 4 (57.1)           | 1              |
| Microcytic Honeycombing                         | 44 (60.3)    | 33 (63.5)          | 3 (75.0)           | 3 (30.0)            | 5 (71.4)           | 0.20           |
| Traction Bronchiectasis                         | 71 (97.3)    | 52 (100)           | 4 (100)            | 8 (80.0)            | 7 (100)            | 0.053          |
| Nodules                                         | 15 (20.5)    | 11 (21.2)          | 1 (25.0)           | 2 (20.0)            | 1 (14.3)           | 1              |
| Parenchymal Bands                               | 22 (30.1)    | 17 (32.7)          | 2 (50.0)           | 3 (30.0)            | 0                  | 0.23           |
| Predominant Ground Glass Opacities*             | 7 (9.6)      | 6 (11.5)           | 1 (25.0)           | 0                   | 0                  | 0.41           |
| Emphysema                                       | 10 (13.7)    | 4 (7.7)            | 1 (25.0)           | 4 (40.0)            | 1 (14.3)           | <b>0.032</b>   |
| <b>Apical-Basal Distribution, N</b>             |              |                    |                    |                     |                    |                |
| Upper Lobe Predominant                          | 6 (8.2)      | 4 (7.7)            | 0                  | 2 (20.0)            | 0                  | 0.51           |
| Lower Lobe Predominant                          | 46 (63.0)    | 33 (63.5)          | 2 (50.0)           | 6 (60.0)            | 5 (71.4)           | 0.91           |
| Diffuse                                         | 21 (28.8)    | 15 (28.8)          | 2 (50.0)           | 2 (20.0)            | 2 (28.6)           | 0.71           |
| <b>Axial Distribution, N</b>                    |              |                    |                    |                     |                    |                |
| Subpleural                                      | 57 (78.1)    | 41 (78.8)          | 2 (50.0)           | 8 (80.0)            | 6 (85.7)           | 0.56           |
| Peribronchovascular                             | 0            | 0                  | 0                  | 0                   | 0                  | -              |
| Diffuse                                         | 16 (21.9)    | 11 (21.2)          | 2 (50.0)           | 2 (20.0)            | 1 (14.3)           | 0.56           |
| <b>Symmetry, N</b>                              |              |                    |                    |                     |                    |                |
| Right > Left                                    | 14 (19.2)    | 10 (19.2)          | 0                  | 2 (20.0)            | 2 (28.6)           | 0.85           |
| Left > Right                                    | 9 (12.3)     | 8 (15.4)           | 0                  | 0                   | 1 (14.3)           | 0.58           |
| Symmetric                                       | 50 (68.5)    | 34 (64.5)          | 4 (100)            | 8 (80.0)            | 4 (57.1)           | 0.47           |
| <b>Air-trapping, N</b>                          |              |                    |                    |                     |                    |                |
| None                                            | 27 (45.0)    | 19 (47.5)          | 3 (75.0)           | 5 (50.0)            | 0                  | 0.075          |
| Mild                                            | 20 (33.3)    | 13 (32.5)          | 0                  | 4 (40.0)            | 3 (50.0)           | 0.45           |
| Moderate                                        | 10 (16.7)    | 7 (17.5)           | 0                  | 1 (10.0)            | 2 (33.3)           | 0.63           |
| Severe                                          | 3 (5.0)      | 1 (2.5)            | 1 (25.0)           | 0                   | 1 (16.7)           | 0.086          |
| <b>Pulmonary Artery Size, N</b>                 |              |                    |                    |                     |                    |                |
| < 3 cm                                          | 39 (55.7)    | 28 (57.1)          | 3 (75.0)           | 4 (40.0)            | 4 (57.1)           | 0.69           |
| 3-3.5 cm                                        | 25 (35.7)    | 17 (34.7)          | 1 (25.0)           | 5 (50.0)            | 2 (28.6)           | 0.78           |
| > 3.5 cm                                        | 6 (8.6)      | 4 (8.2)            | 0                  | 1 (10.0)            | 1 (14.3)           | 0.85           |
| <b>Mediastinal and Hilar Lymph Node Size, N</b> |              |                    |                    |                     |                    |                |
| < 1 cm                                          | 35 (50)      | 27 (55.1)          | 1 (25.0)           | 3 (30.0)            | 4 (57.1)           | 0.36           |

|                       |           |           |          |          |          |              |
|-----------------------|-----------|-----------|----------|----------|----------|--------------|
| 1-1.5 cm              | 23 (32.9) | 16 (32.7) | 3 (75.0) | 2 (20.0) | 2 (28.6) | 0.30         |
| > 1.5 cm              | 12 (17.1) | 6 (12.2)  | 0        | 5 (50.0) | 1 (14.3) | <b>0.045</b> |
| <b>Pleural Fat, N</b> | 63        | 42        | 4        | 10       | 7        |              |
| None                  | 4 (6.3)   | 1 (2.4)   | 1 (25.0) | 2 (20.0) | 0        | 0.056        |
| Mild                  | 36 (57.1) | 23 (54.8) | 2 (50.0) | 6 (60.0) | 5 (71.4) | 0.89         |
| Marked                | 23 (36.5) | 18 (42.9) | 1 (25.0) | 2 (20.0) | 2 (28.6) | 0.59         |

\*Predominant Ground Glass Opacities refers to ground glass that is out of proportion of degree of fibrosis, or separated from areas of fibrosis.

The data shown are N (%). The prevalence of radiographic characteristics is compared using Fisher's exact test. P-values < 0.05 are shown in bold.

**Supplemental Table S4: Factors Associated with the Presence of Emphysema in ILD Subjects with Heterozygous *TERT*, *TERC*, *RTEL1* or *PARN* Mutations**

|                   | Emphysema Present<br>(n=10) | Emphysema Absent<br>(n=63) | P-value |
|-------------------|-----------------------------|----------------------------|---------|
| Male, N (%)       | 8 (80%)                     | 34 (54%)                   | 0.17    |
| Age, mean (SD)    | 59.9 (5.8)                  | 55.0 (13.2)                | 0.14    |
| Smoking, N (%)    | 8 (80%)                     | 23 (36.5%)                 | 0.015   |
| Gene group, N (%) |                             |                            |         |
| <i>TERT</i>       | 4 (40.0%)                   | 48 (76.2%)                 | 0.028   |
| <i>TERC</i>       | 1 (10.0%)                   | 3 (4.8%)                   | 0.45    |
| <i>RTEL1</i>      | 4 (40.0%)                   | 6 (9.5%)                   | 0.026   |
| <i>PARN</i>       | 1 (10.0%)                   | 6 (9.5%)                   | 1       |

Unadjusted P-values were calculated using Fisher's exact test (categorical variables) or Wilcoxon rank-sum test (age at diagnosis).

**Supplemental Table S5: Histopathologic Characteristics of ILD Subjects with Heterozygous *TERT*, *TERC*, *RTEL1* or *PARN* Mutations**

|                                     | All<br>(N=42) | <i>TERT</i><br>(N=32) | <i>TERC</i><br>(N=2) | <i>RTEL1</i><br>(N=6) | <i>PARN</i><br>(N=2) | P-<br>value  |
|-------------------------------------|---------------|-----------------------|----------------------|-----------------------|----------------------|--------------|
| Histopathologic Diagnosis, N (%)    |               |                       |                      |                       |                      |              |
| UIP                                 | 21 (50.0)     | 16 (50.0)             | 1 (50.0)             | 2 (33.3)              | 2 (100)              | 0.62         |
| NSIP                                | 4 (9.5)       | 3 (9.4)               | 0                    | 1 (16.7)              | 0                    | 0.68         |
| DIP                                 | 1 (2.4)       | 1 (3.1)               | 0                    | 0                     | 0                    | 1            |
| PPFE                                | 5 (11.9)      | 3 (9.4)               | 1 (50.0)             | 1 (16.7)              | 0                    | 0.25         |
| Unclassifiable                      | 3 (7.1)       | 2 (6.2)               | 0                    | 1 (16.7)              | 0                    | 0.57         |
| Organizing DAD                      | 1 (2.4)       | 1 (3.1)               | 0                    | 0                     | 0                    | 1            |
| SRIF                                | 4 (9.5)       | 3 (9.4)               | 0                    | 1 (16.7)              | 0                    | 0.68         |
| Chronic HP                          | 2 (4.7)       | 2 (6.2)               | 0                    | 0                     | 0                    | 1            |
| > 1 Pattern*                        | 1 (2.4)       | 1 (3.1)               | 0                    | 0                     | 0                    | 1            |
| Honeycombing, N (%)                 |               |                       |                      |                       |                      |              |
| Mild                                | 11 (26.2)     | 10 (31.3)             | 0                    | 1 (16.7)              | 0                    | 0.90         |
| Moderate                            | 10 (23.8)     | 7 (21.9)              | 2 (100)              | 1 (16.7)              | 0                    | 0.13         |
| Severe                              | 12 (28.6)     | 9 (28.1)              | 0                    | 1 (16.7)              | 2 (100)              | 0.19         |
| Fibroblastic Foci, N (%)            |               |                       |                      |                       |                      |              |
| Mild                                | 12 (28.6)     | 10 (31.3)             | 0                    | 2 (33.3)              | 0                    | 1            |
| Moderate                            | 7 (16.7)      | 6 (18.8)              | 0                    | 1 (16.7)              | 0                    | 1            |
| Severe                              | 15 (35.7)     | 12 (37.5)             | 1 (50.0)             | 0                     | 2 (100)              | 0.060        |
| Interstitial Fibrosis, N (%)        |               |                       |                      |                       |                      |              |
| Mild                                | 1 (2.4)       | 0                     | 0                    | 1 (16.7)              | 0                    | 0.24         |
| Moderate                            | 5 (11.9)      | 4 (12.5)              | 0                    | 1 (16.7)              | 0                    | 1            |
| Severe                              | 36 (85.7)     | 28 (87.5)             | 2 (100)              | 4 (66.7)              | 2 (100)              | 0.60         |
| Peribronchovascular Fibrosis, N (%) |               |                       |                      |                       |                      |              |
| Mild                                | 14 (33.3)     | 11 (34.4)             | 0                    | 3 (50.0)              | 0                    | 0.56         |
| Moderate                            | 13 (31.0)     | 9 (28.1)              | 2 (100)              | 1 (16.7)              | 1 (50.0)             | 0.15         |
| Severe                              | 10 (23.8)     | 9 (28.1)              | 0                    | 1 (16.7)              | 0                    | 1            |
| Hyalinized or Ropey Collagen, N (%) |               |                       |                      |                       |                      |              |
| Mild                                | 10 (23.8)     | 8 (25.0)              | 0                    | 1 (16.7)              | 1 (50.0)             | 0.78         |
| Moderate                            | 5 (11.9)      | 5 (15.6)              | 0                    | 0                     | 0                    | 0.75         |
| Severe                              | 5 (11.9)      | 3 (9.4)               | 0                    | 2 (33.3)              | 0                    | 0.51         |
| Fibroelastosis, N (%)               |               |                       |                      |                       |                      |              |
| Mild                                | 0             | 0                     | 0                    | 0                     | 0                    | -            |
| Moderate                            | 2 (4.8)       | 2 (6.2)               | 0                    | 0                     | 0                    | 1            |
| Severe                              | 5 (11.9)      | 3 (9.4)               | 1 (50.0)             | 1 (16.7)              | 0                    | 0.25         |
| Acute DAD, N (%)                    |               |                       |                      |                       |                      |              |
| Mild                                | 3 (7.1)       | 1 (3.1)               | 1 (50.0)             | 0                     | 1 (50.0)             | <b>0.027</b> |
| Moderate                            | 1 (2.4)       | 1 (3.1)               | 0                    | 0                     | 0                    | 1            |



|                                                |           |           |          |          |          |              |
|------------------------------------------------|-----------|-----------|----------|----------|----------|--------------|
| Severe                                         | 1 (2.4)   | 1 (3.1)   | 0        | 0        | 0        | 1            |
| Organizing DAD, N (%)                          |           |           |          |          |          |              |
| Mild                                           | 2 (4.8)   | 2 (6.2)   | 0        | 0        | 0        | 1            |
| Moderate                                       | 4 (9.5)   | 3 (9.4)   | 1 (50.0) | 0        | 0        | 0.41         |
| Severe                                         | 3 (7.1)   | 2 (6.2)   | 0        | 0        | 1 (50.0) | 0.31         |
| Acute Fibrinous Organizing<br>Pneumonia, N (%) |           |           |          |          |          |              |
| Mild                                           | 7 (16.7)  | 5 (15.6)  | 0        | 1 (16.7) | 1 (50.0) | 0.56         |
| Moderate                                       | 0         | 0         | 0        | 0        | 0        | -            |
| Severe                                         | 0         | 0         | 0        | 0        | 0        | -            |
| Interstitial Inflammation, N (%)               |           |           |          |          |          |              |
| Mild                                           | 21 (50.0) | 17 (53.1) | 0        | 4 (66.7) | 0        | 0.26         |
| Moderate                                       | 14 (33.3) | 11 (34.4) | 2 (100)  | 0        | 1 (50.0) | <b>0.048</b> |
| Severe                                         | 4 (9.5)   | 2 (6.2)   | 0        | 1 (16.7) | 1 (50.0) | 0.17         |
| Peribronchovascular<br>Inflammation, N (%)     |           |           |          |          |          |              |
| Mild                                           | 14 (33.3) | 10 (31.2) | 1 (50.0) | 3 (50.0) | 0        | 0.56         |
| Moderate                                       | 2 (4.8)   | 1 (3.1)   | 1 (50.0) | 0        | 0        | 0.20         |
| Severe                                         | 0         | 0         | 0        | 0        | 0        | -            |
| Granulomatous Inflammation, N<br>(%)           |           |           |          |          |          |              |
| Loose Granulomas                               | 1 (2.4)   | 1 (3.1)   | 0        | 0        | 0        | 1            |
| Compact Granulomas                             | 2 (4.8)   | 1 (3.1)   | 0        | 1 (16.7) | 0        | 0.42         |
| Lymphoid Aggregates, N (%)                     |           |           |          |          |          |              |
| Mild                                           | 12 (28.6) | 8 (25.0)  | 0        | 3 (50.0) | 1 (50.0) | 0.38         |
| Moderate                                       | 6 (14.3)  | 5 (15.6)  | 0        | 0        | 1 (50.0) | 0.33         |
| Severe                                         | 0         | 0         | 0        | 0        | 0        | -            |
| Organizing Pneumonia, N (%)                    |           |           |          |          |          |              |
| Mild                                           | 1 (2.4)   | 1 (3.1)   | 0        | 0        | 0        | 1            |
| Moderate                                       | 4 (9.5)   | 3 (9.4)   | 0        | 1 (16.7) | 0        | 0.68         |
| Severe                                         | 1 (2.4)   | 1 (3.1)   | 0        | 0        | 0        | 1            |
| Pulmonary Arterial Medial<br>Thickening, N (%) |           |           |          |          |          |              |
| Mild                                           | 15 (35.7) | 13 (40.6) | 0        | 2 (33.3) | 0        | 0.73         |
| Moderate                                       | 16 (38.1) | 10 (31.3) | 2 (100)  | 2 (33.3) | 2 (100)  | 0.08         |
| Severe                                         | 3 (7.1)   | 3 (9.4)   | 0        | 0        | 0        | 1            |

\*Histopathologic specimen with evidence of PPFE and NSIP

The prevalence of histopathologic characteristics is compared using Fisher's exact test. P-values < 0.05 are shown in bold.

Abbreviations used: UIP, usual interstitial pneumonia; NSIP, nonspecific interstitial pneumonia; DIP, desquamative interstitial pneumonia; PPFE, pleuroparenchymal fibroelastosis; DAD, diffuse alveolar damage; SRIF, smoking related interstitial fibrosis; HP, hypersensitivity pneumonitis.

**Supplemental Table S6. Correlation between Radiographic and Histopathologic Diagnoses for ILD Subjects with Heterozygous *TERT*, *TERC*, *RTEL1* or *PARN* Mutations (n=34)**

| <b>Radiographic Diagnosis</b>           | <b>All</b> | <b>Definite UIP (N=18)</b> | <b>Possible UIP (N=8)</b> | <b>Inconsistent with UIP (N=8)</b> |
|-----------------------------------------|------------|----------------------------|---------------------------|------------------------------------|
| <b>Histopathologic Diagnosis, N (%)</b> |            |                            |                           |                                    |
| UIP                                     | 18 (52.9)  | 11 (61.1)                  | 3 (37.5)                  | 4 (50.0)                           |
| NSIP                                    | 3 (8.8)    | 1 (5.6)                    | 1 (12.5)                  | 1 (12.5)                           |
| PPFE                                    | 3 (8.8)    | 1 (5.6)                    | 1 (12.5)                  | 1 (12.5)                           |
| Unclassifiable                          | 3 (8.8)    | 0                          | 2 (25.0)                  | 1 (12.5)                           |
| Organizing DAD                          | 1 (2.9)    | 0                          | 0                         | 1 (12.5)                           |
| SRIF                                    | 3 (8.8)    | 3 (16.7)                   | 0                         | 0                                  |
| Chronic HP                              | 2 (5.8)    | 1 (5.6)                    | 1 (12.5)                  | 0                                  |
| > 1 Pattern*                            | 1 (2.9)    | 1 (5.6)                    | 0                         | 0                                  |

\*More than one histopathologic diagnosis included evidence of PPFE and NSIP

Abbreviations used: UIP, usual interstitial pneumonia; NSIP, nonspecific interstitial pneumonia; PPFE, pleuroparenchymal fibroelastosis; DAD, diffuse alveolar damage; SRIF, smoking related interstitial fibrosis; HP, hypersensitivity pneumonitis.

## References

1. Tsakiri KD, Cronkhite JT, Kuan PJ, Xing C, Raghu G, Weissler JC, Rosenblatt RL, Shay JW, Garcia CK. Adult-onset pulmonary fibrosis caused by mutations in telomerase. *Proc Natl Acad Sci U S A* 2007; 104(18): 7552-7557.
2. Diaz de Leon A, Cronkhite JT, Katzenstein AL, Godwin JD, Raghu G, Glazer CS, Rosenblatt RL, Girod CE, Garrity ER, Xing C, Garcia CK. Telomere lengths, pulmonary fibrosis and telomerase (TERT) mutations. *PLoS ONE* 2010; 5(5): e10680.
3. Tokman S, Singer JP, Devine MS, Westall GP, Aubert J-D, Tamm M, Snell GI, Lee JS, Goldberg HJ, Kukreja J, Garcia CK, Hayes SR. Clinical Outcomes of Lung Transplantation in Patients with Telomerase Mutations. *Journal of Heart and Lung Transplantation* 2015: in press.
4. Xin ZT, Beauchamp AD, Calado RT, Bradford JW, Regal JA, Shenoy A, Liang Y, Lansdorp PM, Young NS, Ly H. Functional characterization of natural telomerase mutations found in patients with hematologic disorders. *Blood* 2007; 109(2): 524-532.
5. Chambers DC, Clarke BE, McGaughran J, Garcia CK. Lung Fibrosis, Premature Graying and Macrocytosis. *American Journal of Respiratory and Critical Care Medicine* 2012: In press.
6. Cronkhite JT, Xing C, Raghu G, Chin KM, Torres F, Rosenblatt RL, Garcia CK. Telomere shortening in familial and sporadic pulmonary fibrosis. *Am J Respir Crit Care Med* 2008; 178(7): 729-737.
7. Yamaguchi H, Calado RT, Ly H, Kajigaya S, Baerlocher GM, Chanock SJ, Lansdorp PM, Young NS. Mutations in TERT, the gene for telomerase reverse transcriptase, in aplastic anemia. *N Engl J Med* 2005; 352(14): 1413-1424.
8. Du HY, Pumbo E, Manley P, Field JJ, Bayliss SJ, Wilson DB, Mason PJ, Bessler M. Complex inheritance pattern of dyskeratosis congenita in two families with 2 different mutations in the telomerase reverse transcriptase gene. *Blood* 2008; 111(3): 1128-1130.
9. Du HY, Pumbo E, Ivanovich J, An P, Maziarz RT, Reiss UM, Chirnomas D, Shimamura A, Vlachos A, Lipton JM, Goyal RK, Goldman F, Wilson DB, Mason PJ, Bessler M. TERC and TERT gene mutations in patients with bone marrow failure and the significance of telomere length measurements. *Blood* 2009; 113(2): 309-316.
10. Parry EM, Alder JK, Qi X, Chen JJ, Armanios M. Syndrome complex of bone marrow failure and pulmonary fibrosis predicts germline defects in telomerase. *Blood* 2011; 117(21): 5607-5611.
11. Ly H, Schertzer M, Jastaniah W, Davis J, Yong SL, Ouyang Q, Blackburn EH, Parslow TG, Lansdorp PM. Identification and functional characterization of 2 variant alleles of the telomerase RNA template gene (TERC) in a patient with dyskeratosis congenita. *Blood* 2005; 106(4): 1246-1252.
12. Fogarty PF, Yamaguchi H, Wiestner A, Baerlocher GM, Sloand E, Zeng WS, Read EJ, Lansdorp PM, Young NS. Late presentation of dyskeratosis congenita as apparently acquired aplastic anaemia due to mutations in telomerase RNA. *Lancet* 2003; 362(9396): 1628-1630.
13. Ortmann CA, Niemeyer CM, Wawer A, Ebell W, Baumann I, Kratz CP. TERC mutations in children with refractory cytopenia. *Haematologica* 2006; 91(5): 707-708.
14. Stuart BD, Choi J, Zaidi S, Xing C, Holohan B, Chen R, Choi M, Dharwadkar P, Torres F, Girod CE, Weissler J, Fitzgerald J, Kershaw C, Klesney-Tait J, Mageto Y, Shay JW, Ji W, Bilguvar K, Mane S, Lifton RP, Garcia CK. Exome sequencing links mutations in PARN and RTEL1 with familial pulmonary fibrosis and telomere shortening. *Nat Genet* 2015; 47(5): 512-517.
